# Supplementary material
Source: PubMed Central journal article supplement (PMC10482844)
Supplement: 41418_2023_1203_MOESM3_ESM.pdf [file 41418_2023_1203_MOESM3_ESM.pdf]

Dear Editor,

Thanks for your revision. We have collected all authors' replies and combined all of the co-authors' email responses in this document.

Following the authors' replies, we all agreed that added Drs Baoyang Hu, Zhaoqian Teng, and Changmei Liu as co-authors in our revised manuscript for their help in the molecular experiment and manuscript revision.

Thanks for your consideration and we look forward to hearing from you soon.

Yours sincerely,

Jianwei Jiao

✉ 写信

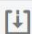

收件箱

Re: Chang... X

回复 回复全部 转发 移动到 标记为 更多 删除 举报

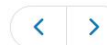

收件箱

1024

待办邮件

已标记邮件

草稿箱

18

已发送

其他文件夹

250

### Re: Change the author list

季芬 发送给 季芬

📧 发起会议  
2023-08-02 09:28:30

Yes, I gree.  
  
Fen Ji

-----原始邮件-----

发件人: "季芬" <[jifen@ioz.ac.cn](mailto:jifen@ioz.ac.cn)>

发送时间: 2023-08-01 18:25:09 (星期二)

收件人: [jwjiao@ioz.ac.cn](mailto:jwjiao@ioz.ac.cn), [jifen@ioz.ac.cn](mailto:jifen@ioz.ac.cn), [fcjames@126.com](mailto:fcjames@126.com), [qinjie22@ioz.ac.cn](mailto:qinjie22@ioz.ac.cn), [2861197372@qq.com](mailto:2861197372@qq.com), [zhangdongming@ioz.ac.cn](mailto:zhangdongming@ioz.ac.cn), [sulibo@ioz.ac.cn](mailto:sulibo@ioz.ac.cn), [wangdwen@mail.ustc.edu.cn](mailto:wangdwen@mail.ustc.edu.cn), [zhangmengtian@ioz.ac.cn](mailto:zhangmengtian@ioz.ac.cn), [lihong@ioz.ac.cn](mailto:lihong@ioz.ac.cn), [malongbing@outlook.com](mailto:malongbing@outlook.com), [Luwcc@sysucc.org.cn](mailto:Luwcc@sysucc.org.cn), [liuchm@ioz.ac.cn](mailto:liuchm@ioz.ac.cn), [tengzq@ioz.ac.cn](mailto:tengzq@ioz.ac.cn), [byhu@ioz.ac.cn](mailto:byhu@ioz.ac.cn), [jianfengzeng@xwh.ccmu.edu.cn](mailto:jianfengzeng@xwh.ccmu.edu.cn), [xiejid6@mail.sysu.edu.cn](mailto:xiejid6@mail.sysu.edu.cn)

抄送:

主题: Change the author list

Hi All,

How are you recently?

I am pleased to inform you that our manuscript CDD-22-2453RRR entitled "Brain-specific Pdl Deficiency Leads to Cortical Neurogenesis Defects and Depressive-like Behaviors in Mice" has been revised in Cell Death and Differentiation. Now we are ready to resubmit.

We added Drs Baoyang Hu, Zhaoqian Teng, and Changmei Liu as co-authors in our revised manuscript for their help in the molecular experiment and manuscript revision.

As required by the journal, we need to request agreement from all authors. Please reply to this email directly with Yes or No and with your name at your earliest convenience so that I can write back to Cell Death and Differentiation.

- 写信
- 收件箱 1024
- 待办邮件
- 已标记邮件
- 草稿箱 18
- 已发送
- 其他文件夹 250

收件箱 Re: Chang... x Re:Change... x

回复 回复全部 转发 移动到 标记为 更多 删除 举报

### Re:Change the author list

冯超 发送给 季芬

发起会议  
2023-08-01 20:01:31

Dear Dr.Ji,  
Yes.  
Answer from Chao Feng.  
All the best  
Chao

At 2023-08-01 18:25:09, "季芬" <jifen@ioz.ac.cn> wrote:

Hi All,

How are you recently?

I am pleased to inform you that our manuscript CDD-22-2453RRR entitled "Brain-specific Pd1 Deficiency Leads to Cortical Neurogenesis Defects and Depressive-like Behaviors in Mice" has been revised in Cell Death and Differentiation. Now we are ready to resubmit.

We added Drs Baoyang Hu, Zhaoqian Teng, and Changmei Liu as co-authors in our revised manuscript for their help in the molecular experiment and manuscript revision.

- 写信
- 收件箱 1024
- 待办邮件
- 已标记邮件
- 草稿箱 18
- 已发送
- 其他文件夹 250

收件箱 Re: Chang... x Re:Change... x Change th... x Re: Chang... x

回复 回复全部 转发 移动到 标记为 更多 删除 举报

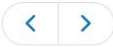

### Re: Change the author list

qinjie22@ioz.ac.cn 发送给 季芬

发起会议  
2023-08-02 08:34:29

Dear All,  
I agree to the change in author list.  
Best,  
Jie Qin

2023-08-01 18:25:09 "季芬" <jifen@ioz.ac.cn>写道:

Hi All,  
How are you recently?  
I am pleased to inform you that our manuscript CDD-22-2453RRR entitled "Brain-specific Pdl Deficiency Leads to Cortical Neurogenesis Defects and Depressive-like Behaviors in Mice" has been revised in Cell Death and Differentiation. Now we are ready to resubmit.  
We added Drs Baoyang Hu, Zhaoqian Teng, and Changmei Liu as co-authors in our revised manuscript for their help in the molecular experiment and manuscript revision.  
**As required by the journal, we need to request agreement from all authors. Please reply to this email directly with Yes or No and with your name at your earliest convenience so that I can write back to Cell Death and Differentiation.**  
Thanks again for your help during the study and revision.  
All the best,  
Fen Ji

- 写信
- 收件箱 1024
- 待办邮件
- 已标记邮件
- 草稿箱 18
- 已发送
- 其他文件夹 250

收件箱 Re: Chang... x Re:Change... x Change th... x Re: Chang... x Re: Chang... x

回复 回复全部 转发 移动到 标记为 更多 删除 举报

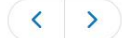

### Re: Change the author list

钦原 发送给 季芬

发起会议  
2023-08-02 09:04:28

Dear All,  
I agree to the change in author list.  
Best,  
wang chong

---Original---

**From:** "季芬" <jifen@ioz.ac.cn>  
**Date:** Tue, Aug 1, 2023 18:25 PM  
**To:** "jwjiao" <jwjiao@ioz.ac.cn>; "jifen" <jifen@ioz.ac.cn>; "fcjames" <fcjames@126.com>; "qinjie22" <qinjie22@ioz.ac.cn>; "2861197372" <2861197372@qq.com>; "zhangdongming" <zhangdongming@ioz.ac.cn>; "sulibo" <sulibo@ioz.ac.cn>; "wangdwen" <wangdwen@mail.ustc.edu.cn>; "zhangmengtian" <zhangmengtian@ioz.ac.cn>; "lihong" <lihong@ioz.ac.cn>; "malongbing" <malongbing@outlook.com>; "Luwc" <Luwc@susucc.org.cn>; "liuchm" <liuchm@ioz.ac.cn>; "tengzq" <tengzq@ioz.ac.cn>; "byhu" <byhu@ioz.ac.cn>; "jianfengzeng" <jianfengzeng@xwh.ccmu.edu.cn>; "xiejd6" <xiejd6@mail.sysu.edu.cn>;  
**Subject:** Change the author list

Hi All,

How are you recently?

I am pleased to inform you that our manuscript CDD-22-2453RRR entitled "Brain-specific Pd1 Deficiency Leads to Cortical Neurogenesis Defects and Depressive-like Behaviors in Mice" has been revised in Cell Death and Differentiation. Now we are ready to resubmit.

We added Drs Baoyang Hu, Zhaoqian Teng, and Changmei Liu as co-authors in our revised manuscript for their help in the molecular experiment and manuscript revision.

写信

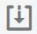

收件箱

Re: Chang... x

Re:Change... x

Change th... x

Re: Chang... x

Re: Chang... x

Re: Re: Ch... x

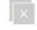

收件箱

1024

待办邮件

已标记邮件

草稿箱

18

已发送

其他文件夹

250

回复 回复全部 转发 移动到 标记为 更多 删除 举报

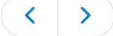

### Re: Re: Change the author list

Dongming Zhang 发送给 季芬

发起会议  
2023-08-02 07:11:33

Yes, I agree.  
  
Dongming Zhang

-----原始邮件-----

发件人: "刘长梅" <liuchm@ioz.ac.cn>

发送时间: 2023-08-01 20:34:16 (星期二)

收件人: "季芬" <jifen@ioz.ac.cn>

抄送: [jwjiao@ioz.ac.cn](mailto:jwjiao@ioz.ac.cn), [fcjames@126.com](mailto:fcjames@126.com), [qinjie22@ioz.ac.cn](mailto:qinjie22@ioz.ac.cn), [2861197372@qq.com](mailto:2861197372@qq.com), [zhangdongming@ioz.ac.cn](mailto:zhangdongming@ioz.ac.cn), [sulibo@ioz.ac.cn](mailto:sulibo@ioz.ac.cn), [wangdwen@mail.ustc.edu.cn](mailto:wangdwen@mail.ustc.edu.cn), [zhangmengtian@ioz.ac.cn](mailto:zhangmengtian@ioz.ac.cn), [lihong@ioz.ac.cn](mailto:lihong@ioz.ac.cn), [malongbing@outlook.com](mailto:malongbing@outlook.com), [Luwcc@sysucc.org.cn](mailto:Luwcc@sysucc.org.cn), [tengzq@ioz.ac.cn](mailto:tengzq@ioz.ac.cn), [byhu@ioz.ac.cn](mailto:byhu@ioz.ac.cn), [jianfengzeng@xwh.ccmu.edu.cn](mailto:jianfengzeng@xwh.ccmu.edu.cn), [xieid6@mail.sysu.edu.cn](mailto:xieid6@mail.sysu.edu.cn)

主题: Re: Change the author list

Yes, I agree.

Chang-Mei Liu

-----原始邮件-----

发件人: "季芬" <jifen@ioz.ac.cn>

发送时间: 2023-08-01 18:25:09 (星期二)

收件人: [jwjiao@ioz.ac.cn](mailto:jwjiao@ioz.ac.cn), [jifen@ioz.ac.cn](mailto:jifen@ioz.ac.cn), [fcjames@126.com](mailto:fcjames@126.com), [qinjie22@ioz.ac.cn](mailto:qinjie22@ioz.ac.cn), [2861197372@qq.com](mailto:2861197372@qq.com), [zhangdongming@ioz.ac.cn](mailto:zhangdongming@ioz.ac.cn), [sulibo@ioz.ac.cn](mailto:sulibo@ioz.ac.cn)

- 写信
- 收件箱 1024
- 待办邮件
- 已标记邮件
- 草稿箱 18
- 已发送
- 其他文件夹 250

收件箱 Re: Chang... × Re:Change... × Change th... × Re: Chang... × Re: Chang... × Re: Re: Ch... × Re: Chang... ×

回复 回复全部 转发 移动到 标记为 更多 删除 举报

### Re: Change the author list

sulibo 发送给 季芬

发起会议  
2023-08-02 08:45:54

Yes. I agree.

Libo Su

-----原始邮件-----

发件人: "季芬" <jifen@ioz.ac.cn>

发送时间: 2023-08-01 18:25:09 (星期二)

收件人: jwjiao@ioz.ac.cn, jifen@ioz.ac.cn, fcjames@126.com, qinjie22@ioz.ac.cn, 2861197372@qq.com, zhangdongming@ioz.ac.cn, sulibo@ioz.ac.cn, wangdwen@mail.usc.edu.cn, zhangmengtian@ioz.ac.cn, lihong@ioz.ac.cn, malongbing@outlook.com, Luwc@sysucc.org.cn, liuchm@ioz.ac.cn, tengzq@ioz.ac.cn, byhu@ioz.ac.cn, jianfengzeng@xwh.ccmu.edu.cn, xiejid6@mail.sysu.edu.cn

抄送:

主题: Change the author list

Hi All,

How are you recently?

I am pleased to inform you that our manuscript CDD-22-2453RRR entitled "Brain-specific Pd1 Deficiency Leads to Cortical Neurogenesis Defects and Depressive-like Behaviors in Mice" has been revised in Cell Death and Differentiation. Now we are ready to resubmit.

We added Drs Baoyang Hu, Zhaoqian Teng, and Changmei Liu as co-authors in our revised manuscript for their help in the molecular experiment and manuscript revision.

As required by the journal, we need to request agreement from all authors. Please reply to this email directly with Yes or No and with your name at

快捷回复给所有人

写信

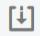

收件箱

Re: Chan... x

Re:Chan... x

Change t... x

Re: Chan... x

Re: Chan... x

Re: Re: C... x

Re: Chan... x

回复: Ch... x

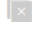

回复

回复全部

转发

移动到 v

标记为 v

更多 v

删除

举报

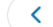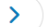

收件箱

1024

待办邮件

已标记邮件

草稿箱

18

已发送

其他文件夹

250

### 回复: Change the author list

wangdwen@mail.ustc.edu.cn 发送给 zhangdongming

发起会议

2023-08-02 07:40:06

Yes, I agree.  
Wenwen Wang

----- 回复的原邮件 -----

发件人 Dongming Zhang <zhangdongming@ioz.ac.cn>

日期 2023年08月02日 07:11

收件人 季芬 <jifen@ioz.ac.cn>

抄送至 jwjiao@ioz.ac.cn、fcjames@126.com、刘长梅 <liuchm@ioz.ac.cn>、qinjie22@ioz.ac.cn、2861197372@qq.com、sulibo@ioz.ac.cn、wangdwen@mail.ustc.edu.cn、zhangmengtian@ioz.ac.cn、lihong@ioz.ac.cn、malongbing@outlook.com、Luw@sysucc.org.cn、tengzq@ioz.ac.cn、byhu@ioz.ac.cn、jianfengzeng@xwh.ccmu.edu.cn、xiejd6@mail.su.edu.cn

主题 Re: Re: Change the author list

Yes, I agree.

Dongming Zhang

-----原始邮件-----

发件人: "刘长梅" <liuchm@ioz.ac.cn>



- 写信
- 收件箱 1024
- 待办邮件
- 已标记邮件
- 草稿箱 18
- 已发送
- 其他文件夹 250

收件箱 Re: Ch... x Re:Cha... x Chang... x Re: Ch... x Re: Ch... x Re: Re: ... x Re: Ch... x 回复: ... x Re: Ch... x

回复 回复全部 转发 移动到 标记为 更多 删除 举报

**Re: Change the author list** 发起会议  
zhangmengtian@ioz.ac.cn 发送给 季芬  
2023-08-02 09:54:37

Yes. I agree.  
zhangmengtian

-----原始邮件-----

发件人: "季芬" <jifen@ioz.ac.cn>  
发送时间: 2023-08-01 18:25:09 (星期二)  
收件人: jwjiao@ioz.ac.cn, jifen@ioz.ac.cn, fcjames@126.com, qinjie22@ioz.ac.cn, 2861197372@qq.com, zhangdongming@ioz.ac.cn, sulibo@ioz.ac.cn, wangdwen@mail.ustc.edu.cn, zhangmengtian@ioz.ac.cn, lihong@ioz.ac.cn, malongbing@outlook.com, Luwc@sysucc.org.cn, liuchm@ioz.ac.cn, tengzq@ioz.ac.cn, byhu@ioz.ac.cn, jianfengzeng@xwh.ccmu.edu.cn, xiejd6@mail.sysu.edu.cn

抄送:  
主题: Change the author list

Hi All,

How are you recently?

I am pleased to inform you that our manuscript CDD-22-2453RRR entitled "Brain-specific Pdl Deficiency Leads to Cortical Neurogenesis Defects and Depressive-like Behaviors in Mice" has been revised in Cell Death and Differentiation. Now we are ready to resubmit.

We added Drs Baoyang Hu, Zhaoqian Teng, and Changmei Liu as co-authors in our revised manuscript for their help in the molecular experiment and manuscript revision.

As required by the journal, we need to request agreement from all authors. Please reply to this email directly with Yes or No and with your name at your earliest convenience so that I can write back to Cell Death and Differentiation.

Thanks again for your help during the study and revision.

写信

收件箱

Re: C... x

Re:Ch... x

Chan... x

Re: C... x

Re: C... x

Re: R... x

Re: C... x

回复... x

Re: C... x

Re: C... x

x

回复

回复全部

转发

移动到 v

标记为 v

更多 v

删除

举报

< >

收件箱

1024

待办邮件

已标记邮件

草稿箱

18

已发送

> 其他文件夹

250

## Re: Change the author list

李红 发送给 季芬

发起会议

2023-08-02 08:36:14

Yes, I agree.

Hong Li

2023-08-01 18:25:09 "季芬" <jifen@ioz.ac.cn>写道:

Hi All,

How are you recently?

I am pleased to inform you that our manuscript CDD-22-2453RRR entitled "Brain-specific Pdl Deficiency Leads to Cortical Neurogenesis Defects and Depressive-like Behaviors in Mice" has been revised in Cell Death and Differentiation. Now we are ready to resubmit.

We added Drs Baoyang Hu, Zhaoqian Teng, and Changmei Liu as co-authors in our revised manuscript for their help in the molecular experiment and manuscript revision.

**As required by the journal, we need to request agreement from all authors. Please reply to this email directly with Yes or No and with your name at your earliest convenience so that I can write back to Cell Death and Differentiation.**

Thanks again for your help during the study and revision.

All the best,

Fen Ji

- 写信
- 收件箱 1024
- 待办邮件
- 已标记邮件
- 草稿箱 18
- 已发送
- 其他文件夹 250

收件箱 Re: Chang... x

回复 回复全部 转发 移动到 标记为 更多 删除 举报

< >

### Re: Change the author list

发起会议 2023-08-01 18:27:45

MA Longbing 发送给 季芬

YES. Ma longbing

获取 Outlook for iOS

**发件人:** 季芬 <jifen@ioz.ac.cn>  
**发送时间:** Tuesday, August 1, 2023 6:25:09 PM  
**收件人:** jwjiao@ioz.ac.cn <jwjiao@ioz.ac.cn>; jifen@ioz.ac.cn <jifen@ioz.ac.cn>; fcjames@126.com <fcjames@126.com>; qinjie22@ioz.ac.cn <qinjie22@ioz.ac.cn>; 2861197372@qq.com <2861197372@qq.com>; zhangdongming@ioz.ac.cn <zhangdongming@ioz.ac.cn>; sulibo@ioz.ac.cn <sulibo@ioz.ac.cn>; wangdwen@mail.ustc.edu.cn <wangdwen@mail.ustc.edu.cn>; zhangmengtian@ioz.ac.cn <zhangmengtian@ioz.ac.cn>; lihong@ioz.ac.cn <lihong@ioz.ac.cn>; malongbing@outlook.com <malongbing@outlook.com>; Luwc@sysucc.org.cn <Luwc@sysucc.org.cn>; liuchm@ioz.ac.cn <liuchm@ioz.ac.cn>; tengzq@ioz.ac.cn <tengzq@ioz.ac.cn>; byhu@ioz.ac.cn <byhu@ioz.ac.cn>; jianfengzeng@xwh.ccmu.edu.cn <jianfengzeng@xwh.ccmu.edu.cn>; xiejid6@mail.sysu.edu.cn <xiejid6@mail.sysu.edu.cn>  
**主题:** Change the author list

Hi All,

How are you recently?

I am pleased to inform you that our manuscript CDD-22-2453RRR entitled "Brain-specific Pdl Deficiency Leads to Cortical Neurogenesis Defects and Depressive-like Behaviors in Mice" has been revised in Cell Death and Differentiation. Now we are ready to resubmit.

We added Drs Baoyang Hu, Zhaoqian Teng, and Changmei Liu as co-authors in our revised manuscript for their help in the molecular experiment and manuscript revision.

**As required by the journal, we need to request agreement from all authors. Please reply to this email directly with Yes or No and with your name at your earliest convenience so that I can write back to Cell Death and Differentiation.**

Thanks again for your help during the study and revision.

All the best,

Fen Ti

写信

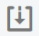

收件箱 1024

待办邮件

已标记邮件

草稿箱 18

已发送

其他文件夹 250

收件箱

Re: Chang... ×

Re:Change... ×

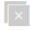

回复 回复全部 转发 移动到 标记为 更多 删除 举报

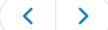

### Re:Change the author list

发起会议

2023-08-01 18:27:34

陆伟成 发送给 季芬

Yes.

Best regards,  
Weicheng Lu

Department of Anesthesiology  
Sun Yat-sen University Cancer Center  
Guangzhou 510060

陆伟成  
中山大学肿瘤医院手术麻醉科  
广州510060

----- Original -----

**From:** "季芬" <jifen@ioz.ac.cn>;  
**Date:** Tue, Aug 1, 2023 06:25 PM  
**To:** "jwjiao" <jwjiao@ioz.ac.cn>; "jifen" <jifen@ioz.ac.cn>; "fcjames" <fcjames@126.com>; "qinjie22" <qinjie22@ioz.ac.cn>; "2861197372" <2861197372@qq.com>; "zhangdongming" <zhangdongming@ioz.ac.cn>; "sulibo" <sulibo@ioz.ac.cn>; "wangdwen" <wangdwen@mail.ustc.edu.cn>; "zhangmengtian" <zhangmengtian@ioz.ac.cn>; "lihong" <lihong@ioz.ac.cn>; "malongbing" <malongbing@outlook.com>; "Luwc" <Luwc@sysucc.org.cn>; "liuchm" <liuchm@ioz.ac.cn>; "tengzq" <tengzq@ioz.ac.cn>; "byhu" <byhu@ioz.ac.cn>; "jianfengzeng" <jianfengzeng@xwh.ccmu.edu.cn>; "谢敬敏" <xiejid@mail.sysu.edu.cn>;  
**Subject:** Change the author list

Hi All,

How are you recently?

I am pleased to inform you that our manuscript CDD-22-2453RRR entitled "Brain-specific Pdl Deficiency Leads to Cortical Neurogenesis Defects and Depressive-like Behaviors in Mice" has been revised in Cell Death and Differentiation. Now we are ready to resubmit.

- 写信
- 收件箱 1024
- 待办邮件
- 已标记邮件
- 草稿箱 18
- 已发送
- 其他文件夹 250

收件箱 Re: Chang... x

回复 回复全部 转发 移动到 标记为 更多 删除 举报

**Re: Change the author list** 发起会议 2023-08-01 20:34:16

刘长梅 发送给 季芬

Yes, I agree.

Chang-Mei Liu

-----原始邮件-----  
发件人: "季芬" <jifen@ioz.ac.cn>  
发送时间: 2023-08-01 18:25:09 (星期二)  
收件人: jwjiao@ioz.ac.cn, jifen@ioz.ac.cn, fcjames@126.com, qinjie22@ioz.ac.cn, 2861197372@qq.com, zhangdongming@ioz.ac.cn, sulibo@ioz.ac.cn, wangdwen@mail.usc.edu.cn, zhangmengtian@ioz.ac.cn, lihong@ioz.ac.cn, malongbing@outlook.com, Luwc@sysucc.org.cn, liuchm@ioz.ac.cn, tengzq@ioz.ac.cn, byhu@ioz.ac.cn, jianfengzeng@xwh.ccmu.edu.cn, xiejd6@mail.sysu.edu.cn  
抄送:  
主题: Change the author list

Hi All,

How are you recently?

I am pleased to inform you that our manuscript CDD-22-2453RRR entitled "Brain-specific Pdl Deficiency Leads to Cortical Neurogenesis Defects and Depressive-like Behaviors in Mice" has been revised in Cell Death and Differentiation. Now we are ready to resubmit.

We added Drs Baoyang Hu, Zhaoqian Teng, and Changmei Liu as co-authors in our revised manuscript for their help in the molecular experiment and manuscript revision.

As required by the journal, we need to request agreement from all authors. Please reply to this email directly with Yes or No and with your name at your earliest convenience so that I can write back to Cell Death and Differentiation.

写信

收件箱 Re: Chang... x Re: 回复: ... x

- 收件箱 1024
- 待办邮件
- 已标记邮件
- 草稿箱 18
- 已发送
- 其他文件夹 250

回复 回复全部 转发 移动到 标记为 更多 删除 举报

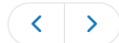

### Re: 回复: Change the author list

发起会议  
2023-08-02 08:17:11

TENG Zhao-Qian 滕兆乾 发送给 wangdwen@mail.ustc.edu.cn

Dear All,  
I agree to the change in author list.  
Best,  
Zhao-Qian Teng

-----Original Messages-----

**From:** "wangdwen@mail.ustc.edu.cn" <wangdwen@mail.ustc.edu.cn>  
**Sent Time:** 2023-08-02 07:40:06 (Wednesday)  
**To:** zhangdongming <zhangdongming@ioz.ac.cn>  
**Cc:** jifen <jifen@ioz.ac.cn>, jwjiao <jwjiao@ioz.ac.cn>, fcjames <fcjames@126.com>, liuchm <liuchm@ioz.ac.cn>, qinjie22 <qinjie22@ioz.ac.cn>, 2861197372 <2861197372@qq.com>, sulibo <sulibo@ioz.ac.cn>, zhangmengtian <zhangmengtian@ioz.ac.cn>, lihong <lihong@ioz.ac.cn>, malongbing <malongbing@outlook.com>, Luwc <Luwc@sysucc.org.cn>, tengzq <tengzq@ioz.ac.cn>, byhu <byhu@ioz.ac.cn>, jianfengzeng <jianfengzeng@xwh.ccmu.edu.cn>, xiejd6 <xiejd6@mail.sysu.edu.cn>  
**Subject:** 回复: Change the author list

Yes, I agree.  
Wenwen Wang

----- 回复的原邮件 -----

发件人 Dongming Zhang <zhangdongming@ioz.ac.cn>  
日期 2023年08月02日 07:11

写信

收件箱 Re: Chang... x

收件箱 1024

待办邮件

已标记邮件

草稿箱 18

已发送

其他文件夹 250

回复 回复全部 转发 移动到 标记为 更多 删除 举报

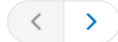

### Re: Change the author list

发起会议

2023-08-02 10:07:26

byhu 发送给 季芬

I agree with the change. Baoyang

Sent with Unibox

On Aug 1, 2023, at 6:25 PM, 季芬 <jifen@ioz.ac.cn> wrote:

Hi All,

How are you recently?

I am pleased to inform you that our manuscript CDD-22-2453RRR entitled "Brain-specific Pd1 Deficiency Leads to Cortical Neurogenesis Defects and Depressive-like Behaviors in Mice" has been revised in Cell Death and Differentiation. Now we are ready to resubmit.

We added Drs Baoyang Hu, Zhaoqian Teng, and Changmei Liu as co-authors in our revised manuscript for their help in the molecular experiment and manuscript revision.

**As required by the journal, we need to request agreement from all authors. Please reply to this email directly with Yes or No and with your name at your earliest convenience so that I can write back to Cell Death and Differentiation.**

Thanks again for your help during the study and revision.

All the best,

Fen Ji

- 写信
- 收件箱 1024
- 待办邮件
- 已标记邮件
- 草稿箱 18
- 已发送
- 其他文件夹 250

收件箱 Re: Chang... x Re:Change... x

回复 回复全部 转发 移动到 标记为 更多 删除 举报

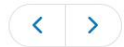

### Re:Change the author list

发起会议  
2023-08-02 07:23:09

曹凤增 发送给 季芬

Yes I agree.  
JIAN Fengzeng

在 2023-08-01 18:25:09, 季芬 <jifen@ioz.ac.cn> 写道:

>Hi All,  
>  
>How are you recently?  
>  
>I am pleased to inform you that our manuscript CDD-22-2453RRR entitled "Brain-specific Pd1 Deficiency Leads to Cortical Neurogenesis Defects and Depressive-like Behaviors in Mice" has been revised in Cell Death and Differentiation. Now we are ready to resubmit.  
>  
>We added Drs Baoyang Hu, Zhaoqian Teng, and Changmei Liu as co-authors in our revised manuscript for their help in the molecular experiment and manuscript revision.  
>  
>As required by the journal, we need to request agreement from all authors. Please reply to this email directly with Yes or No and with your name at your earliest convenience so that I can write back to Cell Death and Differentiation.  
>  
>Thanks again for your help during the study and revision.  
>  
>All the best,  
>  
>Fen Ji



- 写信
- 收件箱 1024
- 待办邮件
- 已标记邮件
- 草稿箱 18
- 已发送
- 其他文件夹 250

收件箱 Re: Chang... x Re:Change... x Re:Change... x

回复 回复全部 转发 移动到 标记为 更多 删除 举报

< >

### Re:Change the author list

发起会议  
2023-08-02 05:52:47

谢敬敦 发送给 季芬

Yes, I agree.  
Jingdun Xie

在 2023-08-01 18:25:09, "季芬" <jifen@ioz.ac.cn> 写道:

>Hi All,  
>  
>How are you recently?  
>  
>I am pleased to inform you that our manuscript CDD-22-2453RRR entitled "Brain-specific Pdl Deficiency Leads to Cortical Neurogenesis Defects and Depressive-like Behaviors in Mice" has been revised in Cell Death and Differentiation. Now we are ready to resubmit.  
>  
>We added Drs Baoyang Hu, Zhaoqian Teng, and Changmei Liu as co-authors in our revised manuscript for their help in the molecular experiment and manuscript revision.  
>  
>As required by the journal, we need to request agreement from all authors. Please reply to this email directly with Yes or No and with your name at your earliest convenience so that I can write back to Cell Death and Differentiation.  
>  
>Thanks again for your help during the study and revision.  
>  
>All the best,  
>  
>Fen Ji

- 写信
- 收件箱 1024
- 待办邮件
- 已标记邮件
- 草稿箱 18
- 已发送
- 其他文件夹 250

收件箱 Re: Chang... x Re:Change... x Re:Change... x Re: Chang... x

回复 回复全部 转发 移动到 标记为 更多 删除 举报

< >

### Re: Change the author list

发起会议  
2023-08-02 09:53:06

jwjiao 发送给 季芬

Yes, I agree.  
Jianwei Jiao

发自我的 iPhone

在 2023年8月1日, 18:25, 季芬 <jifen@ioz.ac.cn> 写道:

Hi All,

How are you recently?

I am pleased to inform you that our manuscript CDD-22-2453RRR entitled "Brain-specific Pdl Deficiency Leads to Cortical Neurogenesis Defects and Depressive-like Behaviors in Mice" has been revised in Cell Death and Differentiation. Now we are ready to resubmit.

We added Drs Baoyang Hu, Zhaoqian Teng, and Changmei Liu as co-authors in our revised manuscript for their help in the molecular experiment and manuscript revision.

**As required by the journal, we need to request agreement from all authors. Please reply to this email directly with Yes or No and with your name at your earliest convenience so that I can write back to Cell Death and Differentiation.**

Thanks again for your help during the study and revision.

All the best,
